# Supplementary material for: Probabilistic diagram for designing chemicals with reduced potency to incur cytotoxicity
Source: Royal Society of Chemistry journal article supplement (doi:10.1039/c6gc01058j), 2016-01-01
Supplement: c6gc01058j1.pdf [file c6gc01058j1.pdf]

■ Electronic Supplementary Information (ESI)

## Probabilistic Diagram for Designing Chemicals with Reduced Potency to Incur Cytotoxicity

Longzhu Q. Shen(1), Richard S. Judson(2), John Roethle(3), Aditya Gudibanda(4), Julie B. Zimmerman(1), Paul T. Anastas(1\*)

(1) School of Forestry and Environmental Studies, Yale University, New Haven, CT 06511

(2) U.S. EPA, National Center for Computational Toxicology, RTP NC 27711

(3) Department of Chemistry, Yale University, New Haven, CT 06511

(4) Department of Computer Science, Yale University, New Haven, CT 06511

### Contents

|                                                           | Page S   |
|-----------------------------------------------------------|----------|
| <b>1 Distribution for the Number of Tests</b>             | <b>2</b> |
| <b>2 Cytotoxicity Hitrate Plot</b>                        | <b>2</b> |
| <b>3 Histograms for the Training Set of the Chemicals</b> | <b>3</b> |

## 1 Distribution for the Number of Tests

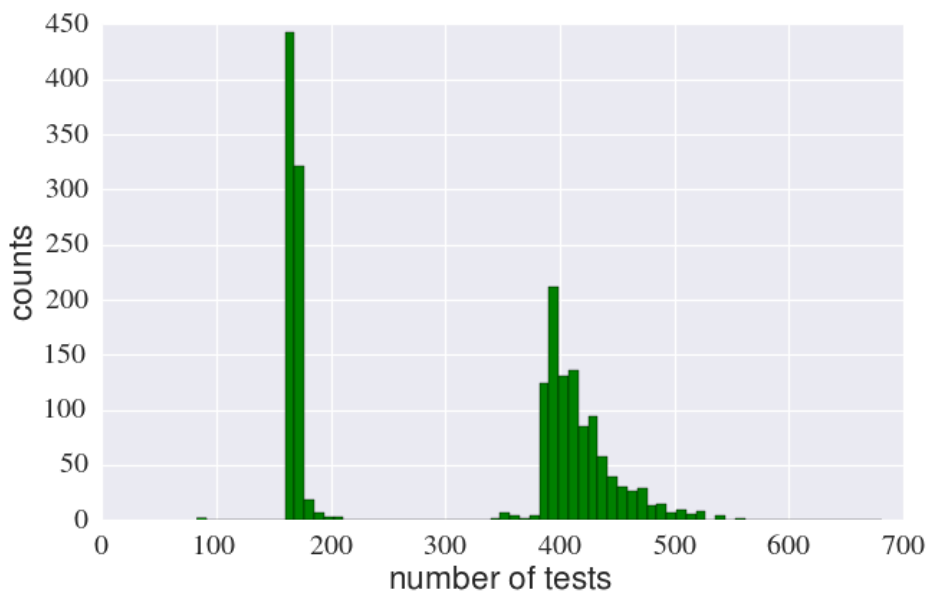

Figure S 1: Distribution for the number of tests for chemicals in ToxCast data set

The chemicals that have been tested more than 300 assays were chosen for this study.

## 2 Cytotoxicity Hitrate Plot

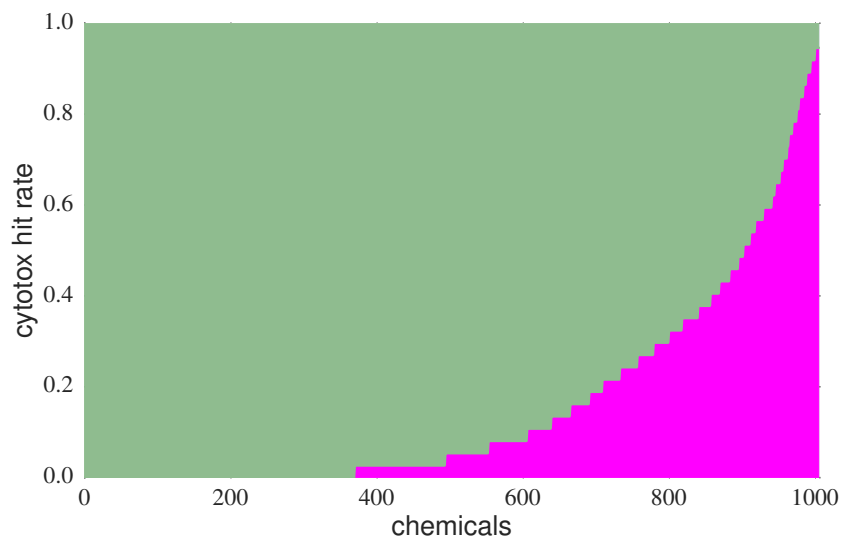

Figure S 2: Hit rate plot for cytotoxicity assays. Green zone represents negative test outcomes and pink zone represents positive test outcomes.

### 3 Histograms for the Training Set of the Chemicals

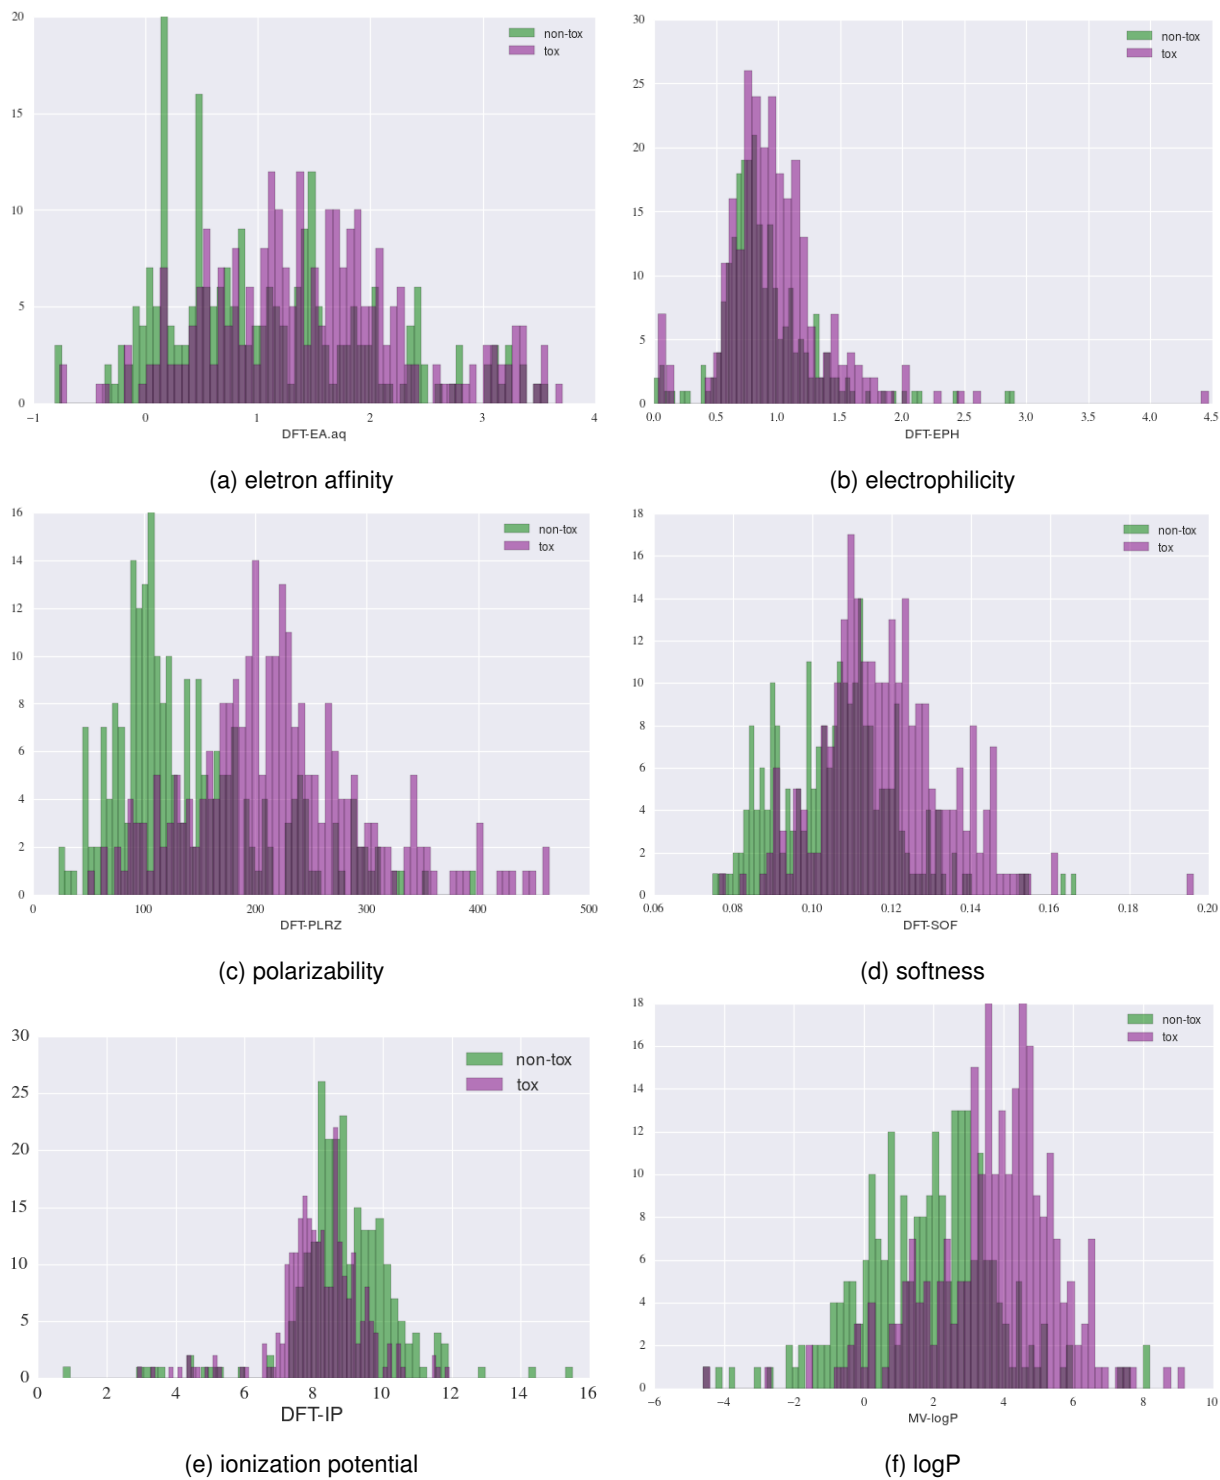

Figure S 3: Histograms for the training set (50% of the total chemicals). Color coding : green – non-toxic (inactive) chemicals. purple – toxic (active) chemicals.
